# Supplementary material for: Trends in the Prescription of Non-Vitamin K Antagonist Oral Anticoagulants for Atrial Fibrillation: Results of the Polish Atrial Fibrillation (POL-AF) Registry
Source: PubMed Central journal article supplement (PMC7694480; doi:10.3390/jcm9113565), 2020-11-05
Supplement: jcm-09-03565-s001.pdf [file jcm-09-03565-s001.pdf]

**Supplementary Table S1.** Prescription pattern of apixaban, dabigatran and rivaroxaban across centres.

| number of centre | type of centre | all n=2971 | Apixaban n=953 | Dabigatran n=819 | Rivaroxaban n=1199 |
|------------------|----------------|------------|----------------|------------------|--------------------|
| 1                | academic       | 709        | 267 (37.7)     | 221 (31.2)       | 221 (31.2)         |
| 2                | academic       | 284        | 101 (35.6)     | 68 (23.9)        | 115 (40.5)         |
| 3                | academic       | 151        | 51 (33.8)      | 37 (24.5)        | 63 (41.7)          |
| 4                | regional       | 272        | 119 (43.8)     | 82 (30.1)        | 71 (26.1)          |
| 5                | academic       | 351        | 65 (18.5)      | 97 (27.6)        | 189 (53.8)         |
| 6                | academic       | 60         | 15 (25.0)      | 7 (11.7)         | 38 (63.3)          |
| 7                | military       | 430        | 132 (30.7)     | 73 (17.0)        | 225 (52.3)         |
| 8                | regional       | 248        | 72 (29.0)      | 76 (30.6)        | 100 (40.4)         |
| 9                | academic       | 257        | 93 (36.2)      | 91 (35.4)        | 73 (28.4)          |
| 10               | academic       | 209        | 38 (18.2)      | 67 (32.0)        | 104 (49.8)         |

**Supplementary Table S2.** Factors associated with the selection of individual NOAC over another NOAC for stroke prevention in patients with AF - univariable logistic regression models.

| Factors                                      | Apixaban |           |                 | Dabigatran |           |                 | Rivaroxaban |           |                 |
|----------------------------------------------|----------|-----------|-----------------|------------|-----------|-----------------|-------------|-----------|-----------------|
|                                              | OR       | 95%CI     | p               | OR         | 95%CI     | p               | OR          | 95%CI     | p               |
| CHA <sub>2</sub> DS <sub>2</sub> -VASc score | 1.14     | 1.09-1.19 | < <b>0.0001</b> | 0.94       | 0.9-0.99  | <b>0.0114</b>   | 0.93        | 0.9-0.97  | <b>0.0008</b>   |
| HAS-BLED score                               | 1.42     | 1.3-1.55  | < <b>0.0001</b> | 0.93       | 0.85-1.02 | 0.1114          | 0.77        | 0.71-0.84 | < <b>0.0001</b> |
| Age (per 5 years)                            | 1.19     | 1.14-1.23 | < <b>0.0001</b> | 0.92       | 0.89-0.95 | < <b>0.0001</b> | 0.93        | 0.9-0.96  | < <b>0.0001</b> |
| Heart failure                                | 1.37     | 1.16-1.61 | <b>0.0002</b>   | 0.82       | 0.69-0.97 | <b>0.0187</b>   | 0.89        | 0.77-1.04 | 0.1493          |
| Vascular disease                             | 1.21     | 1.03-1.41 | <b>0.018</b>    | 1.03       | 0.88-1.22 | 0.6852          | 0.82        | 0.71-0.95 | <b>0.0088</b>   |
| Female                                       | 1.28     | 1.1-1.5   | <b>0.0018</b>   | 0.73       | 0.62-0.86 | <b>0.0001</b>   | 1.04        | 0.9-1.2   | 0.6158          |
| Non-permanent AF                             | 0.65     | 0.54-0.77 | < <b>0.0001</b> | 1.13       | 0.93-1.37 | 0.2112          | 1.37        | 1.15-1.63 | <b>0.0005</b>   |
| Malignancy                                   | 1.48     | 1.04-2.11 | <b>0.0282</b>   | 0.77       | 0.51-1.17 | 0.2216          | 0.84        | 0.58-1.2  | 0.3256          |
| Any previous bleeding                        | 2.59     | 1.86-3.62 | < <b>0.0001</b> | 0.81       | 0.55-1.2  | 0.2965          | 0.41        | 0.28-0.61 | < <b>0.0001</b> |
| GFR < 60 ml/min/1.73m <sup>2</sup>           | 1.95     | 1.66-2.28 | < <b>0.0001</b> | 0.69       | 0.59-0.81 | < <b>0.0001</b> | 0.75        | 0.65-0.87 | <b>0.0001</b>   |
| Antiplatelets with NOAC                      | 2.37     | 1.58-3.55 | < <b>0.0001</b> | 0.62       | 0.38-1.04 | 0.0678          | 0.58        | 0.37-0.91 | <b>0.0168</b>   |

Abbreviation: CI, confidence interval; eGFR, estimated glomerular filtration rate; NOAC, non-vitamin K antagonist oral anticoagulant; OR, odds ratio.
